# Supplementary material
Source: publisher site journal article supplement (https://www.spandidos-publications.com/3039/downloadSupplementary)

Figure S1. Microarray data quality control. (A) Box plots showing the symmetry of data and the degree of dispersion. The ordinate represents the fold change ( $\log_2$ ) in signal values of probes. (B) Heatmaps revealing all differentially expressed lncRNAs and mRNAs. Red in heatmap indicates increased expression; green in heatmap indicates decreased expression. Purple, green, blue and red on the top of heatmap indicate day 0, 7, 14 and 28, respectively. lncRNAs, long non-coding RNAs.

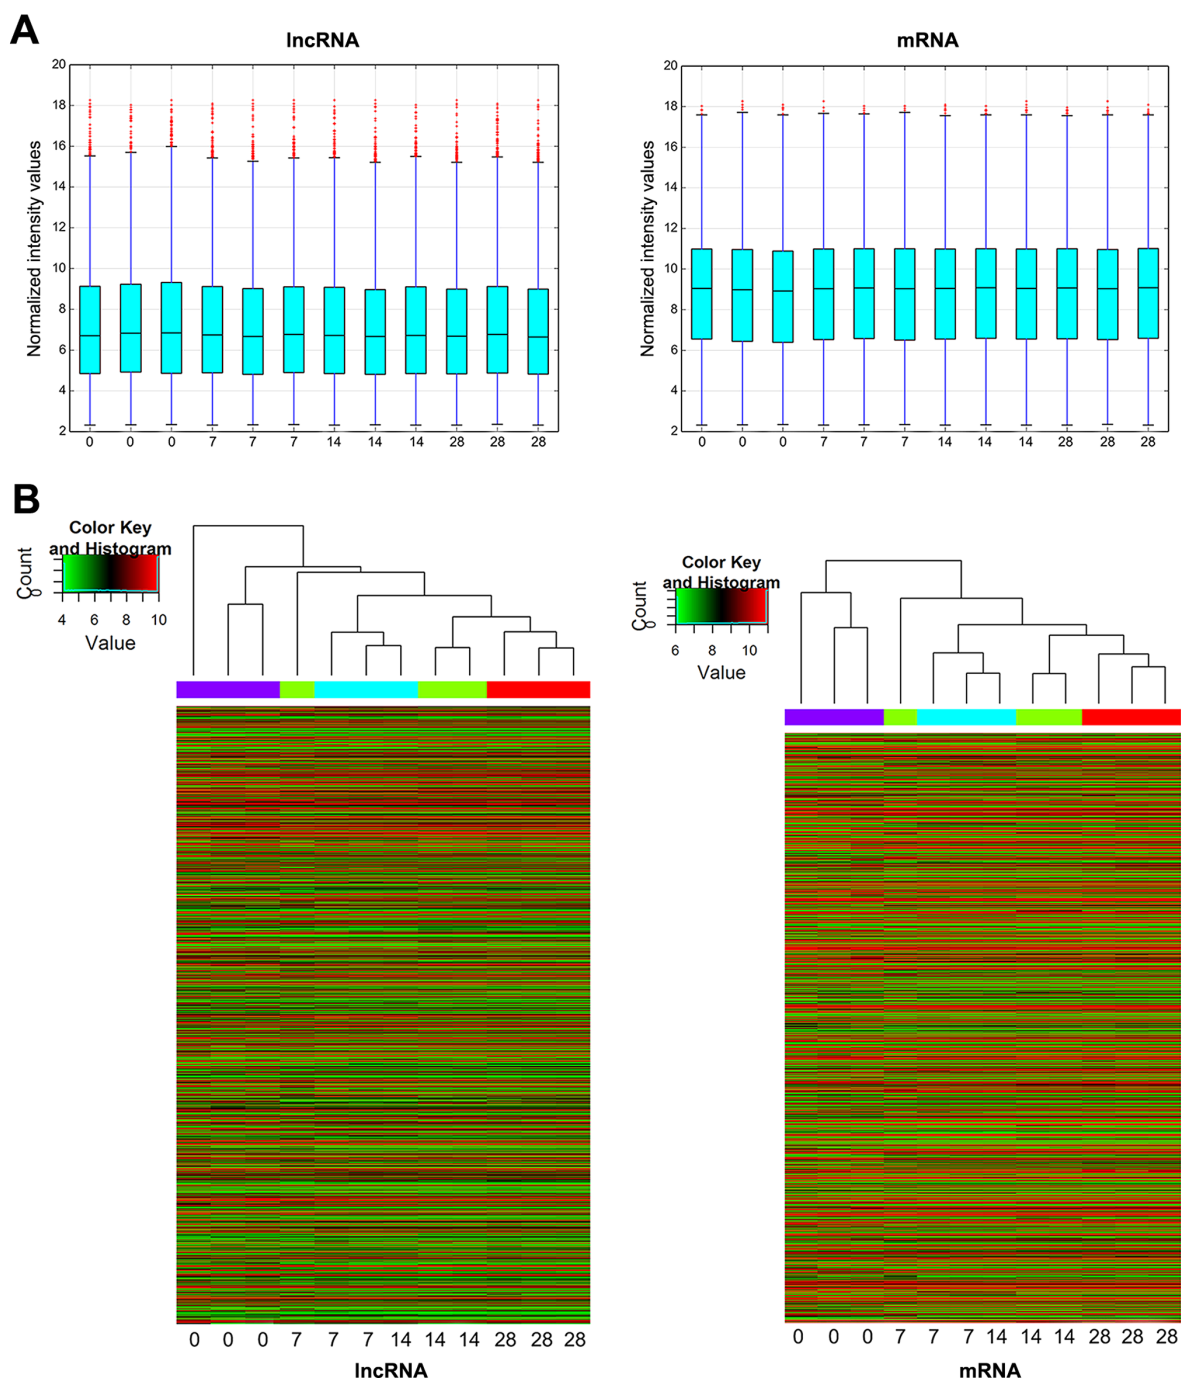

Figure S2. Heatmaps showing mRNAs that were differentially expressed between groups. Scatter and volcano plots were generated to show the variations in mRNA expression between different time points (0 vs. 7, 14 and 28 day). Red and green in heatmap indicate increased and decreased expression, respectively; blue on the top of heatmap indicates the control group (day 0); red on the top of heatmap indicates the experimental group (day 7, 14 and 28, respectively); orange and blue in scatter plots indicate significantly and non-significantly expressed mRNAs; red and grey in volcano plots indicate significantly and non-significantly expressed mRNAs.

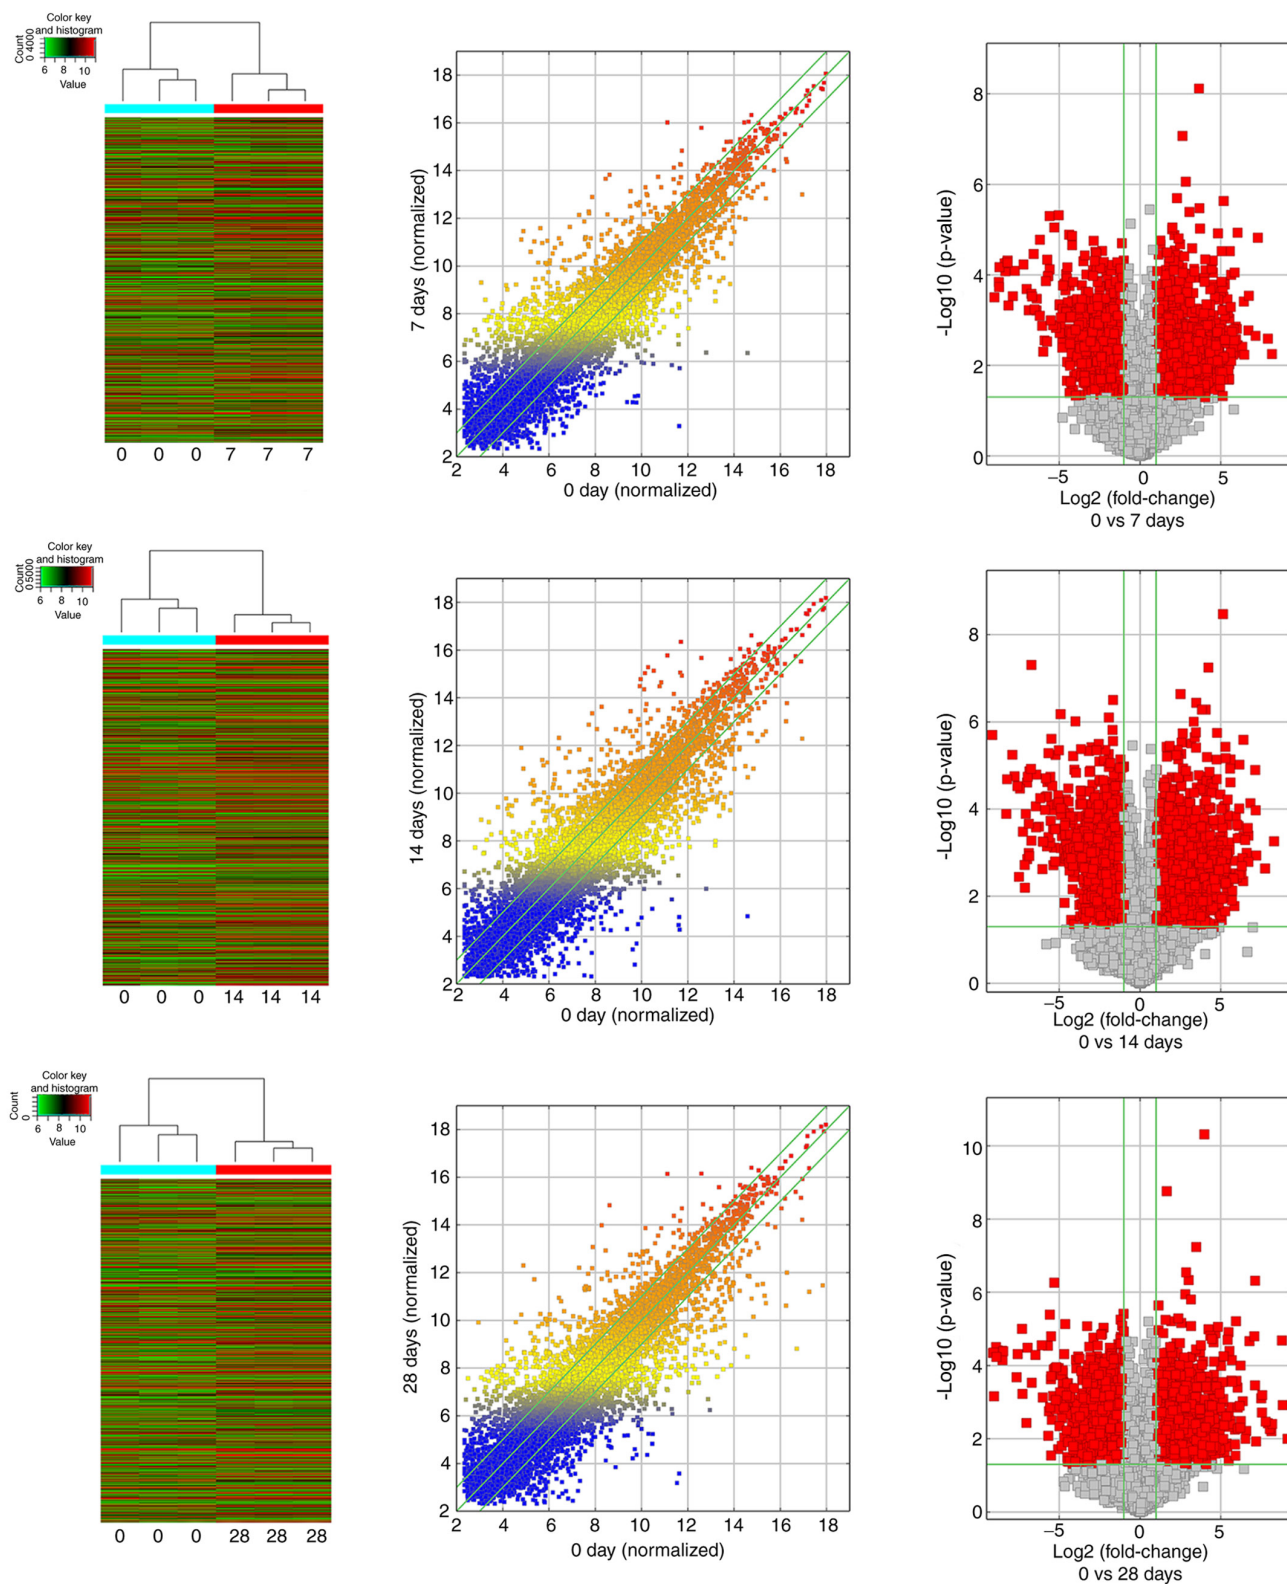

Supplement: Supplementary file 1 [file downloadSupplementary]
